# Supplementary material for: Cell-type specific synaptic plasticity in dorsal striatum is associated with punishment-resistance compulsive-like cocaine self-administration in mice
Source: PubMed Central journal article supplement (PMC9852591; doi:10.1038/s41386-022-01429-8), 2022-09-07
Supplement: 41386_2022_1429_MOESM1_ESM.pdf [file 41386_2022_1429_MOESM1_ESM.pdf]

## **SUPPLEMENTAL MATERIAL**

# **Cell-type specific synaptic plasticity in dorsal striatum is associated with punishment-resistance compulsive-like cocaine self-administration in mice**

Vincent Pascoli<sup>1,3</sup>, Agnès Hiver<sup>1,3</sup>, Yue Li<sup>1</sup>, Masaya Harada<sup>1</sup>, Vahid Esmaeili<sup>1</sup> and Christian Lüscher<sup>1,2</sup>

<sup>1</sup> Department of Basic Neurosciences, Medical Faculty, University of Geneva, 1211 Geneva, Switzerland

<sup>2</sup> Clinic of Neurology, Department of Clinical Neurosciences, Geneva University Hospital, 1211 Geneva, Switzerland

<sup>3</sup> Co-first author

\*Correspondence: [Christian.Lüscher@unige.ch](mailto:Christian.Lüscher@unige.ch)

**a**

|                                                                         |                                                                     |                                                                       |
|-------------------------------------------------------------------------|---------------------------------------------------------------------|-----------------------------------------------------------------------|
| Acquisition:<br>Cocaine self-administration<br>12 daily sessions of 5 h | Baseline:<br>Cocaine self-administration<br>3 daily sessions of 2 h | Punishment:<br>Cocaine self-administration<br>4 daily sessions of 2 h |
|-------------------------------------------------------------------------|---------------------------------------------------------------------|-----------------------------------------------------------------------|

**b**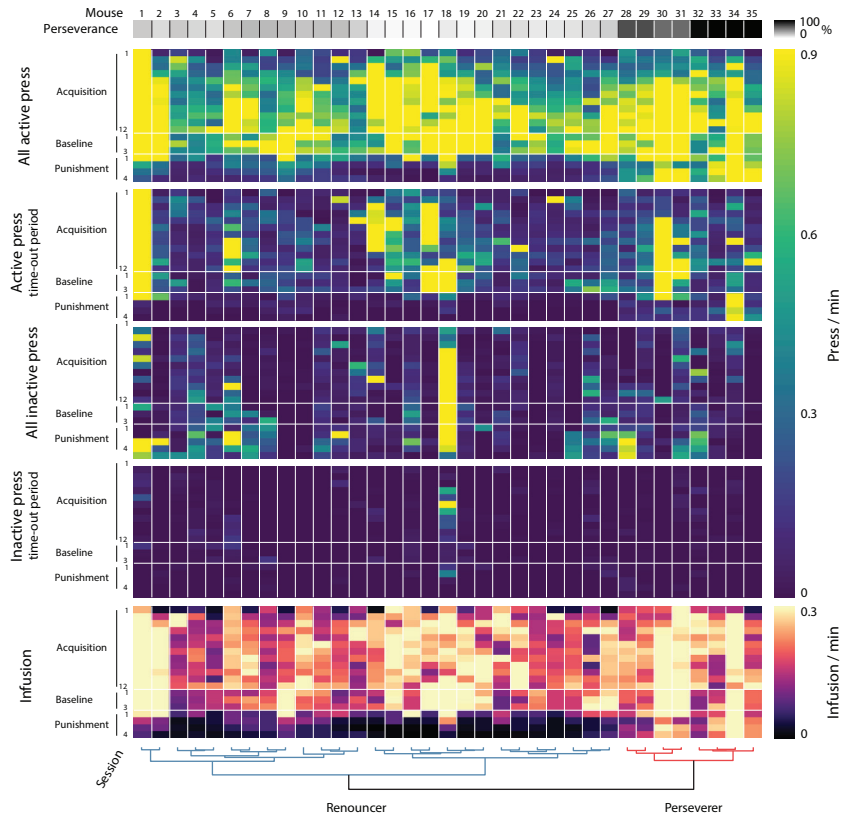**c**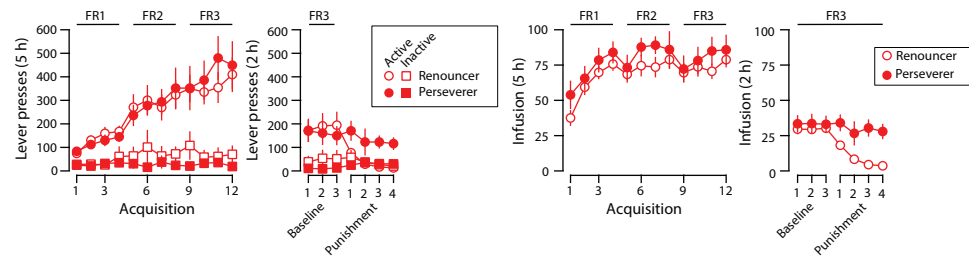**d**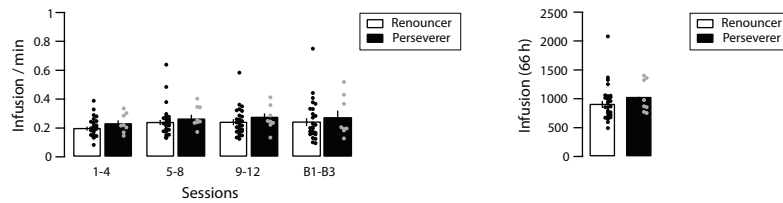**e**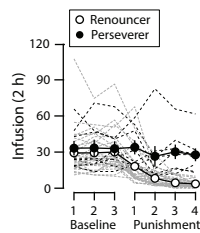**f**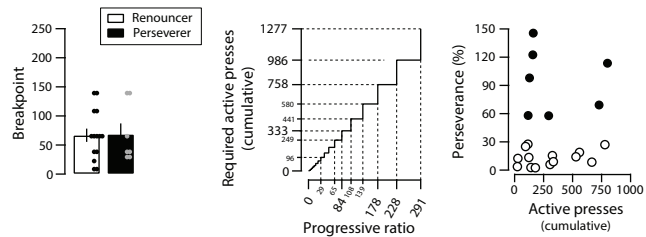

**Supplemental Figure 1: Retrospective analysis of cocaine self-administration acquisition in renouncing and persevering mice.**

**(a)** Experiment schedule. **(b)** Heat maps showing the cocaine self-administration behavioral parameter of each mouse during acquisition, baseline and punished sessions. Clustering was performed with all behavioral parameters of the last two punished sessions and correlation with perseverance. **(c)** Active and inactive lever presses (left) and infusion (right) during acquisition, baseline and punished sessions of cocaine self-administration for renouncing and persevering mice ( $N = 27$  and  $8$  mice, respectively). **(d)** Left, Mean rate of infusions during the different phases of cocaine self-administration (4 sessions of 5 h with FR1 (1-4), 4 sessions of 5 h with FR2 (5-8), 4 sessions of 5 h with FR3 (9-12) and the 3 baseline sessions of 2 h with FR3 (B1-B3)). Right, Total number of infusions obtained during the 15 sessions of cocaine self-administration before the introduction of punishment in renouncers and perseverers ( $N = 27$  and  $8$  mice, respectively). The time spent during these 15 sessions represent 66 hours. **(e)** Mean number of cocaine infusions during to baseline and punished sessions in renouncers and perseverers ( $N = 27$  and  $8$  mice respectively). Dashed lines represented individual mouse. **(f)** Left, Breakpoint for renouncers and perseverers ( $N = 14$  and  $7$  mice, respectively). Middle, schedule of the progressive ratio showing the cumulative number of active lever presses required to reach each reinforced ratio. Right, Perseverance as a function of cumulative number of active presses made during the progressive ratio session. Each dots represents a renouncer or a perseverer ( $N = 14$  and  $7$  mice respectively). Data are expressed as mean  $\pm$  SEM.

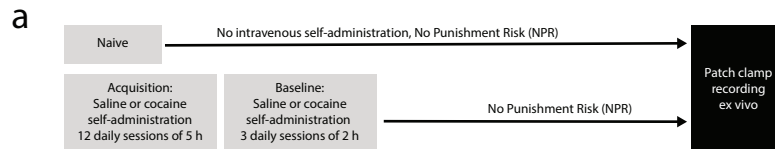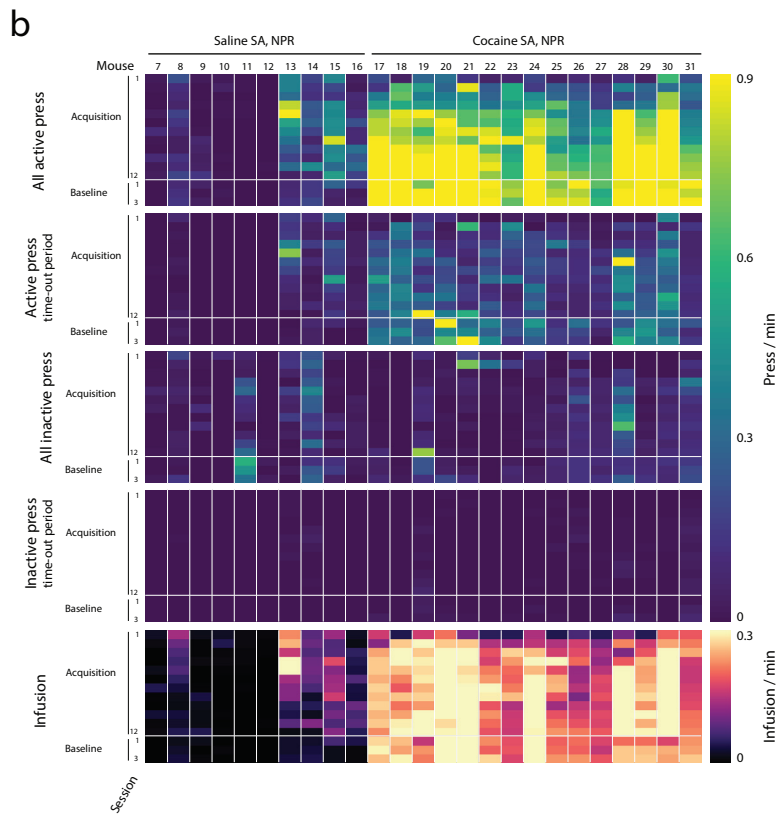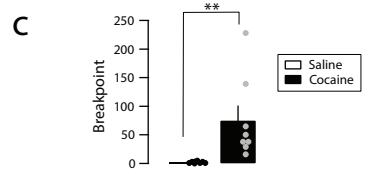

Pascoli et al., Supplemental Figure 2

## **Supplemental Figure 2: Cocaine vs saline intravenous self-administration**

**(a)** Experiment schedule. **(b)** Heat maps showing the saline and cocaine self-administration behavioral parameter of each mouse during acquisition and baseline sessions. **(c)** Breakpoint obtained during the progressive ratio experiment mice self-administering saline or cocaine ( $N = 10$  and  $8$  mice, respectively). Student's  $t$ -test:  $**P < 0.01$ . Data are expressed as mean  $\pm$  SEM.
